# Supplementary material for: A Chlamydia effector recruits CEP170 to reprogram host microtubule organization
Source: J Cell Sci. 2015 Sep 15;128(18):3420–34. doi: 10.1242/jcs.169318 (PMC4582400; doi:10.1242/jcs.169318)
Supplement: Supplementary information [file supp_jcs.169318_JCS169318supp.pdf]

# Supplementary Figures

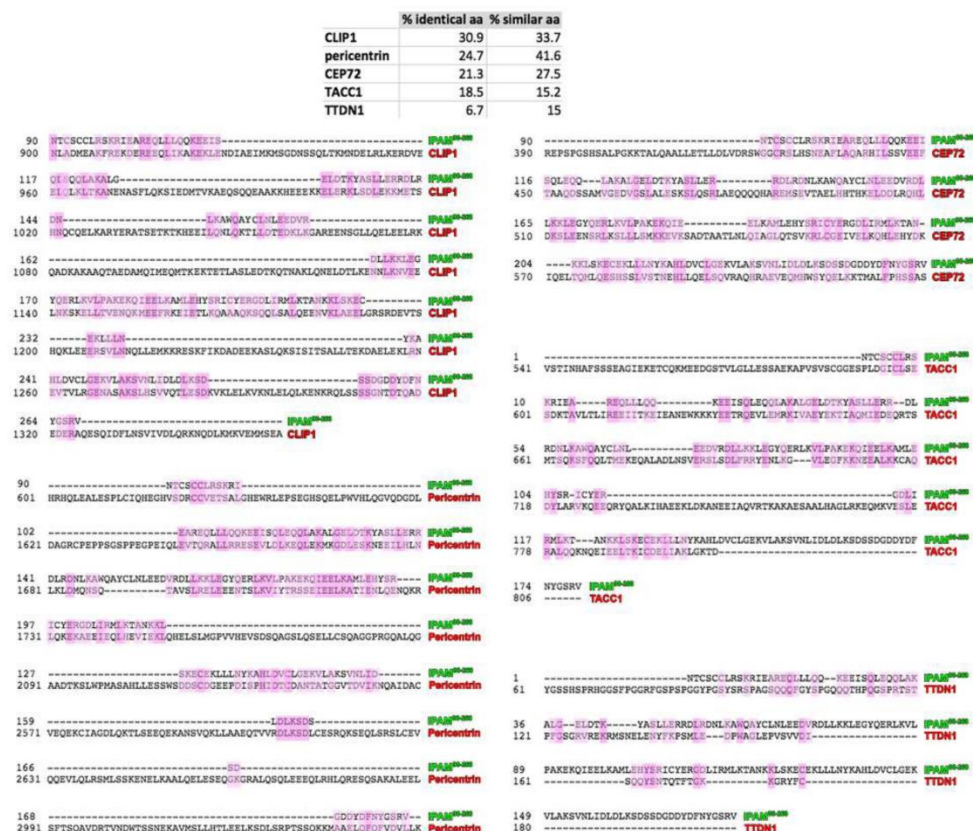

**Fig S1: Primary sequence similarity between IPAM<sup>90-268</sup> and human centrosomal and microtubule-related proteins.**

Table shows amino acid identity and similarity of the top 5 *Homo sapiens* proteins.

Panels show pairwise alignments of these 5 proteins with IPAM<sup>90-268</sup>, where identical amino acids are highlighted in dark purple and similar amino acids in light purple. CLIP1: cytoplasmic linker protein 1, CEP72: centrosomal protein 72kDa, TACC1: transforming-acidic coiled-coil protein, TTD1: trichothiodystrophy protein 1 non-photosensitive.

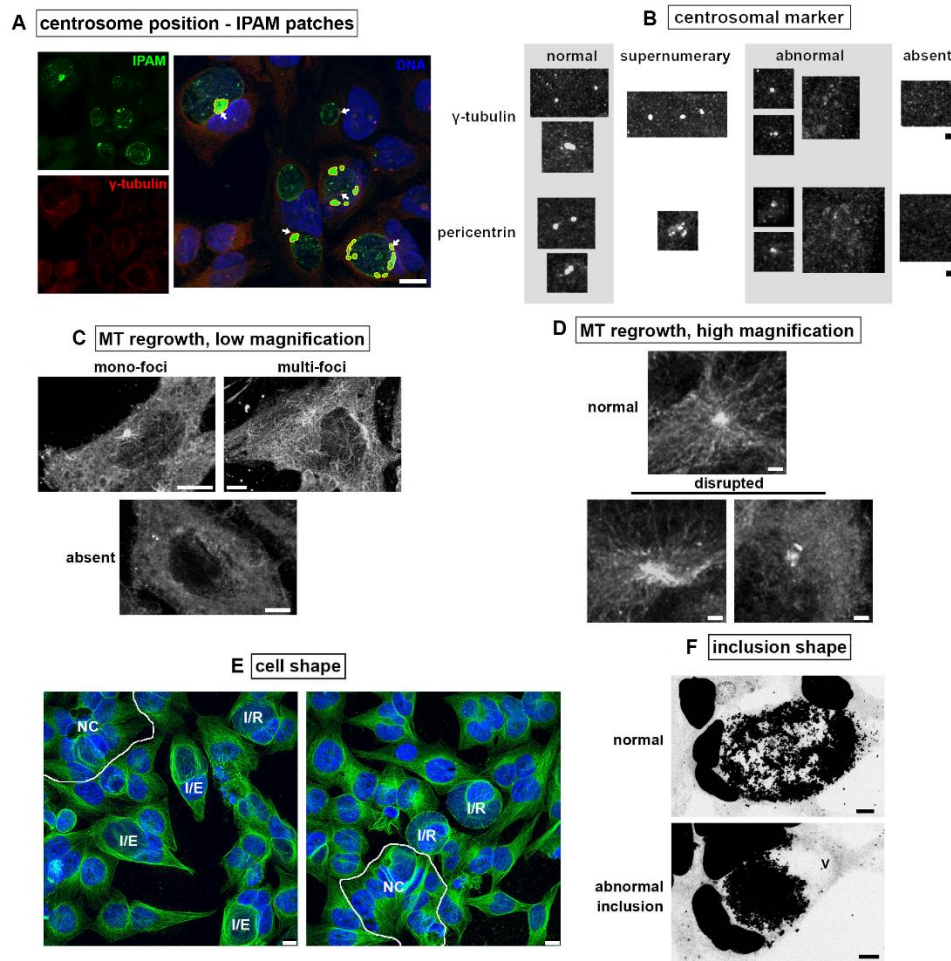

**Fig S2: Representative images depicting classes used for quantification.**

HeLa cells were treated/infected/subject to MT regrowth assay as appropriate. Cells were labeled for the structure of interest, and confocal z-stacks acquired prior to Max-projection analysis of the whole cell volume. A minimum of 150 infected cells and 250 non-infected cells were quantified per experimental condition. Dividing cells were excluded. Figures show representative images depicting the classes used (**A**) to determine IPAM patches and the positioning of  $\gamma$ -tubulin (**B**) to describe the labeling of  $\gamma$ -tubulin and pericentrin. Scale bar: 2  $\mu$ m (**C**) to determine the number of foci of MT nucleation. Scale bar: 10  $\mu$ m. (**D**) to determine the features of individual nucleation foci. Scale bar: 5  $\mu$ m (**E**) to determine cell shape. Cells were labeled to visualize DNA (blue) and microtubules (green). NC: non-considered area due to high cell confluency, I/E: infected elongated cells, I/R: infected round cells. Scale bar: 10  $\mu$ m. (**F**) to assess inclusion organization. Look up table for the nucleic acid channel was inverted. V: void. Scale bar: 10  $\mu$ m.

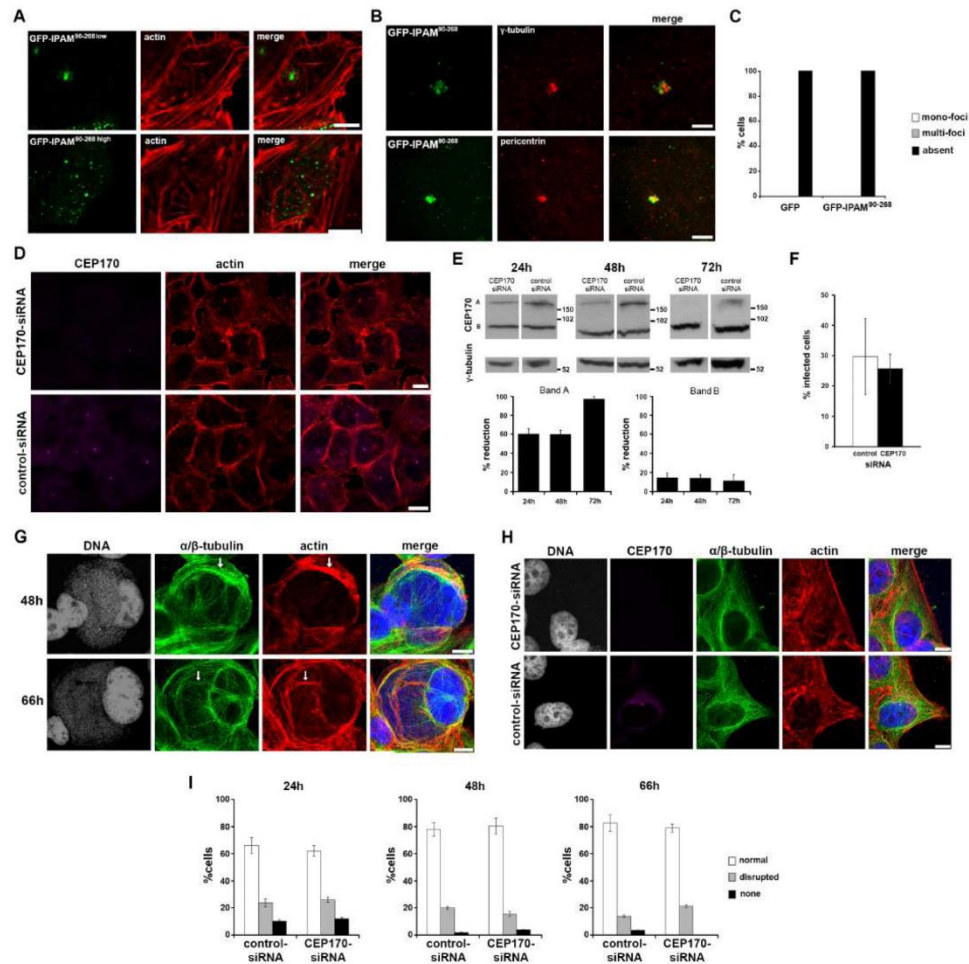

**Fig S3: Impact of expression of GFP-IPAM<sup>90-268</sup> and CEP170 knockdown on cytoskeleton.**

(A) HeLa cells expressing low (GFP-IPAM<sup>90-268 low</sup>; top) or high (GFP-IPAM<sup>90-268 high</sup>; bottom) levels of GFP-IPAM<sup>90-268</sup> (green) were fixed and stained for F-actin (red).

Scale bar: 5  $\mu$ m. **(B)** MTs were depolymerized in HeLa cells expressing GFP-IPAM<sup>90-268</sup> (green) prior to fixation and staining for  $\gamma$ -tubulin or pericentrin (red). Panels show maximum projections of 3 confocal z-sections. Scale bar: 5  $\mu$ m. **(C)** MTs were depolymerized in HeLa cells expressing GFP or GFP-IPAM<sup>90-268</sup>, and MT architecture in individual cells categorized (as described in **Fig S2C**). **(D)** HeLa cells were treated with CEP170-siRNA or control siRNA, fixed and stained for CEP170 (magenta) and F-actin (red). Panels show maximum projections of 3 z-sections. Scale bar: 10  $\mu$ m. **(E)** Immunoblots using anti-CEP170 and anti- $\gamma$ -tubulin antibodies of HeLa cell lysates following treatment with CEP170-siRNA or control-siRNA for 24-72 h. Histograms show reduction in CEP170 species (bands A and B) corrected for relative loading using  $\gamma$ -tubulin. **(F)** HeLa cells were treated with control-siRNA or CEP170-siRNA and infected with *C.trachomatis* L2. Infectivity was assessed 24 h later. **(G)** HeLa cells were treated with CEP170-siRNA and infected with *C.trachomatis* L2. Cells were fixed 48 h or 66 h later and stained for DNA (grey/blue),  $\alpha/\beta$ -tubulin (green) and actin (red). Panels show maximum projections obtained from the 4 z-sections. Arrows indicate an extensive contact between actin and microtubules. Scale bar: 10 $\mu$ m. **(H)** Non-infected HeLa cells were treated with CEP170-siRNA or control-siRNA, fixed, and co-stained for DNA (grey/blue), CEP170 (magenta)  $\alpha/\beta$ -tubulin (green) and actin (red). Scale bar: 10  $\mu$ m. **(I)** HeLa cells were treated with CEP170-siRNA or control-siRNA for 24, 48 and 66 h. MTs were depolymerized then allowed to regrow for 5 min prior to fixation and staining for CEP170 and  $\alpha/\beta$ -tubulin. Following confocal imaging, the regrowing MT network in individual cells was categorized (as described in **Fig S2D**). The differences were not statistically significant.

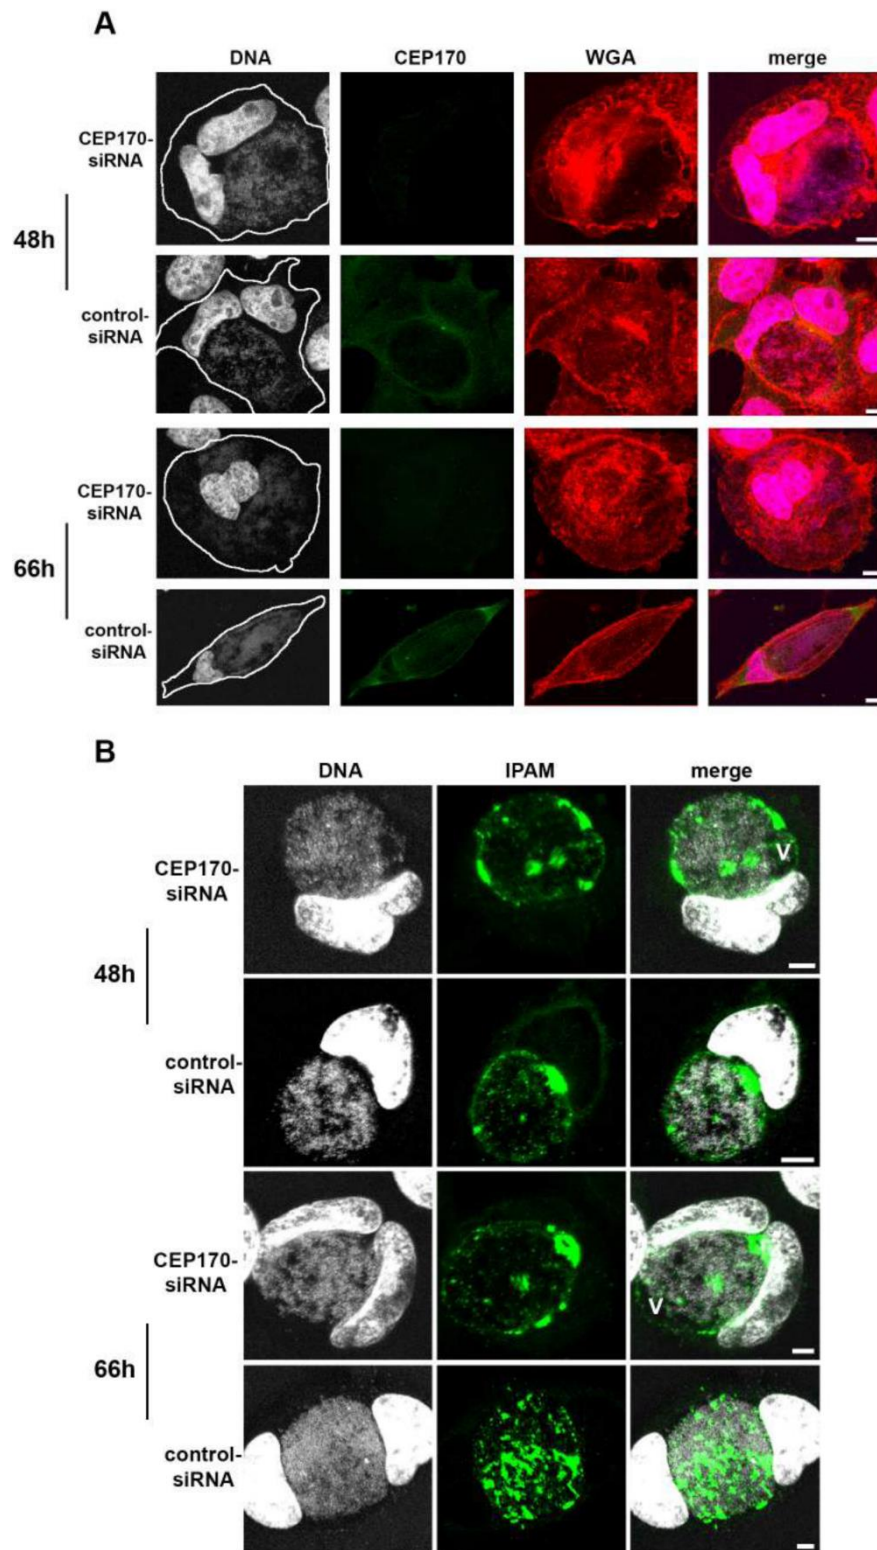

**Fig S4: CEP170 is necessary for cell and inclusion shape in cell infected with *C.trachomatis*.**

HeLa cells were treated with CEP170-siRNA or control-siRNA and infected with *C.trachomatis* for 48 h or 66h prior to fixation and labeling for (A) DNA (grey/magenta), CEP170 (green) and WGA (red) with the cell periphery outlined in white, or (B) DNA (grey) and endogenous IPAM (green), v: void. Scale bar: 10  $\mu$ m.
